# Supplementary material for: Patient preference for early onset of efficacy of preventive migraine treatments
Source: PubMed Central journal article supplement — Headache. 2022 Feb 20;62(3):374–82. doi: 10.1111/head.14255 (PMC9306969; doi:10.1111/head.14255), 2022-02-20
Supplement: HEAD-62-374-s001.pdf [file HEAD-62-374-s001.pdf]

## Supplemental Materials

### ***Supplemental Methods: Thresholding Exercise***

Each participant was presented with two scenarios (treatment A, treatment B), each with a description of the features (likelihood of experiencing a migraine after the first day of treatment, number of days with a migraine in the first month of treatment) and asked to state which they prefer. Based on their response, the probability of experiencing a migraine and number of days was varied.

Exercise 1 varied the amount of reduction in the likelihood of migraine on day one with treatment B.

- If they preferred treatment A, the likelihood of migraine after day one with treatment B will be reduced in the next scenario.
- If they preferred treatment B, the likelihood of migraine after day one with treatment B will be increased in the next scenario.

Exercise 2 varied the amount of reduction in the migraine days per month with treatment B.

- If they preferred treatment A, the number of migraine days per month with treatment B will be reduced in the next scenario.
- If they preferred treatment B, the number of migraine days per month with treatment B will be increased in the next scenario.

The figures below summarize how the levels for each attribute changed depending on the participant's responses, where

Y indicates a preference for treatment A

N indicates a preference for treatment B

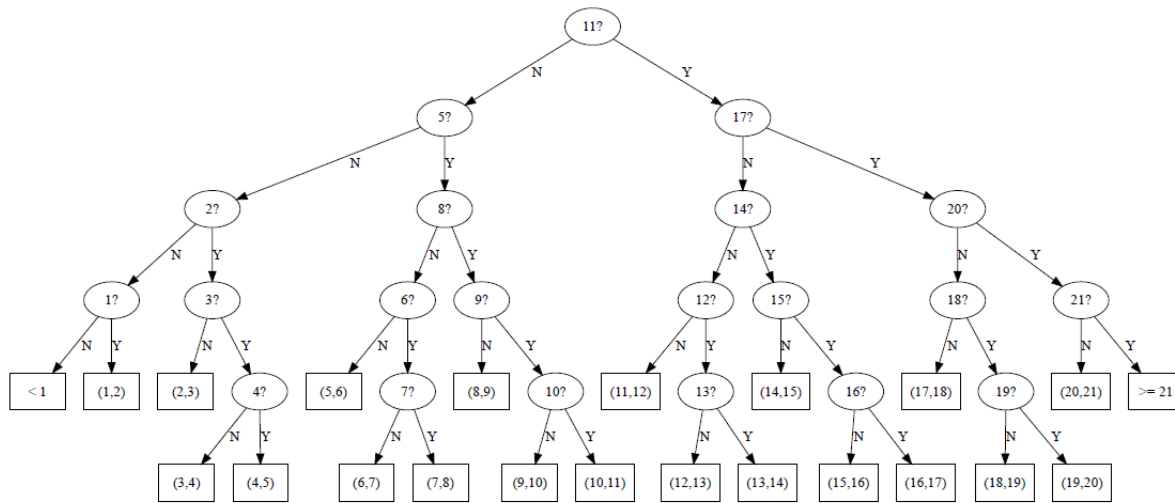

**Choice Frame 1: Patients with Episodic Migraine**

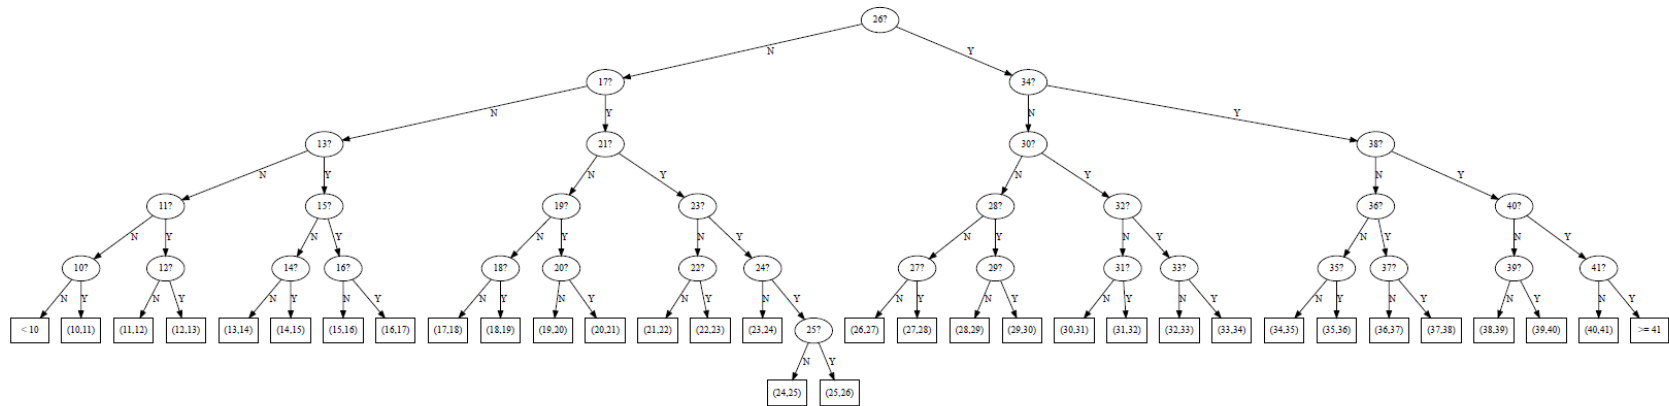

**Choice Frame 1: Patients with Chronic Migraine**

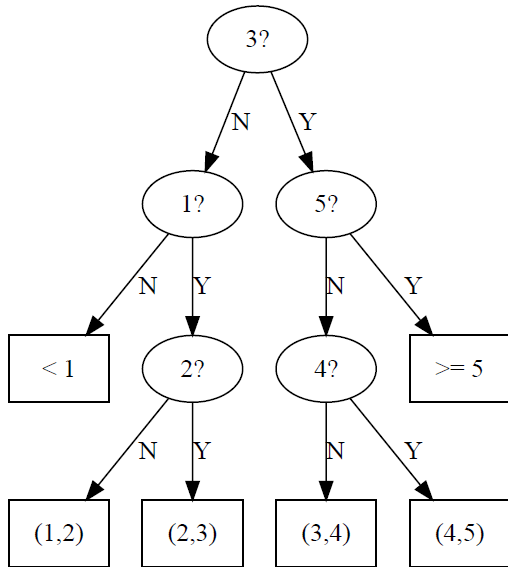

**Choice Frame 2: Patients with Episodic Migraine**

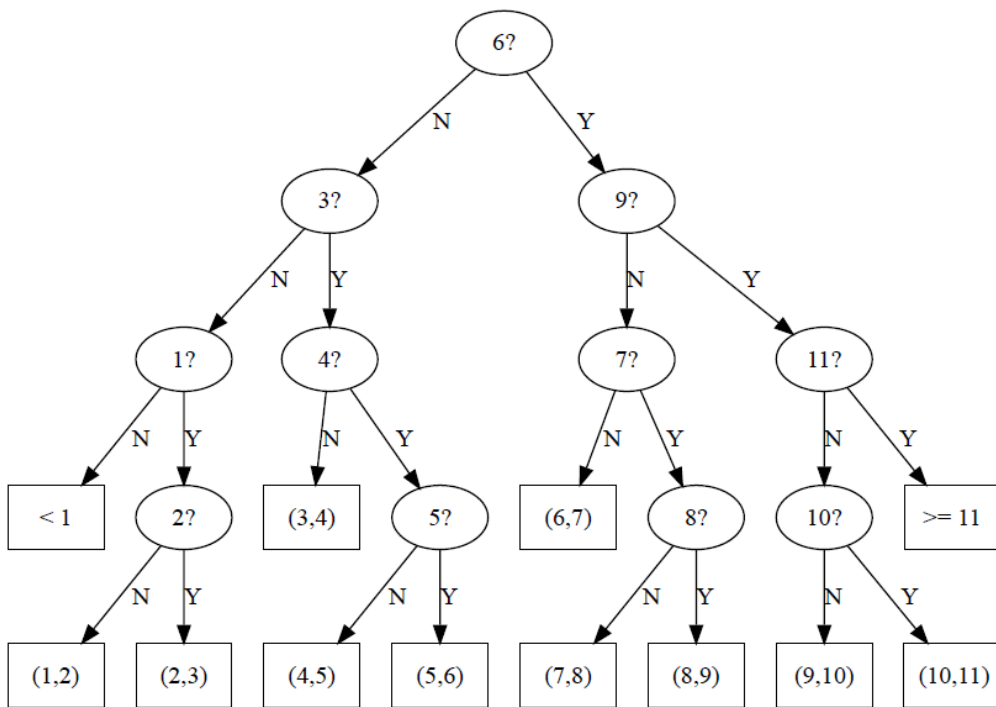

**Choice Frame 2: Patients with Chronic Migraine**

**Supplemental Table 1. Internal Validity and Consistency**

| Criterion                                  | n (%)                       |                                 |                                  |
|--------------------------------------------|-----------------------------|---------------------------------|----------------------------------|
|                                            | Overall sample<br>(N = 101) | Chronic<br>migraine<br>(N = 55) | Episodic<br>migraine<br>(N = 46) |
| Passed dominance test                      | 94 (93)                     | 52 (95)                         | 42 (91)                          |
| Passed stability test                      | 81 (80)                     | 46 (84)                         | 35 (76)                          |
| Not straightliner †                        | 100 (99)                    | 55 (100)                        | 45 (98)                          |
| Time taken to complete choice tasks >1 min | 88 (87)                     | 50 (91)                         | 38 (83)                          |
| No lexicographic preference                | 47 (47)                     | 33 (60)                         | 14 (30)                          |
| Lexicographic preference on choice frame 1 | 33 (33)                     | 12 (22)                         | 21 (46)                          |
| Lexicographic preference on choice frame 2 | 46 (46)                     | 18 (33)                         | 28 (61)                          |
| Passed warm-up task 1                      | 94 (93)                     | 51 (93)                         | 43 (94)                          |
| Passed warm-up task 2                      | 97 (96)                     | 54 (98)                         | 43 (94)                          |

† Straightliners were participants who always chose the same treatment regardless of performance

**Supplemental Table 2. Validity Test Performance According to Presence of Lexicographic Preferences**

| Validity assessment                               | n (%)                                |                                   |                                      |                                   |
|---------------------------------------------------|--------------------------------------|-----------------------------------|--------------------------------------|-----------------------------------|
|                                                   | Chronic migraine                     |                                   | Episodic migraine                    |                                   |
|                                                   | No lexicographic preference (N = 33) | Lexicographic preference (N = 22) | No lexicographic preference (N = 14) | Lexicographic preference (N = 32) |
| Dominance test                                    |                                      |                                   |                                      |                                   |
| Fail                                              | 2 (6)                                | 1 (5)                             | 0 (0)                                | 4 (13)                            |
| Pass                                              | 31 (94)                              | 21 (95)                           | 14 (100)                             | 28 (88)                           |
| Stability test                                    |                                      |                                   |                                      |                                   |
| Fail                                              | 8 (24)                               | 1 (5)                             | 1 (7)                                | 10 (31)                           |
| Pass                                              | 25 (76)                              | 21 (95)                           | 13 (93)                              | 22 (69)                           |
| Straightliner                                     |                                      |                                   |                                      |                                   |
| Not straightlining                                | 33 (100)                             | 22 (100)                          | 14 (100)                             | 31 (97)                           |
| Always choosing treatment A in both choice frames | 0 (0)                                | 0 (0)                             | 0 (0)                                | 1 (3)                             |
| Time taken to complete choice tasks               |                                      |                                   |                                      |                                   |
| ≥ 1 min                                           | 30 (91)                              | 20 (91)                           | 14 (100)                             | 24 (75)                           |
| < 1 min                                           | 3 (9)                                | 2 (9)                             | 0 (0)                                | 8 (25)                            |
| Passed warm-up question 1                         |                                      |                                   |                                      |                                   |
| No                                                | 3 (9)                                | 1 (5)                             | 0 (0)                                | 3 (9)                             |
| Yes                                               | 30 (91)                              | 21 (95)                           | 14 (100)                             | 29 (91)                           |
| Passed warm-up question 2                         |                                      |                                   |                                      |                                   |
| No                                                | 1 (3)                                | 0 (0)                             | 0 (0)                                | 3 (9)                             |
| Yes                                               | 32 (97)                              | 22 (100)                          | 14 (100)                             | 29 (91)                           |

**Supplemental Table 3. Marginal Rate of Substitution**

| <b>Sample</b>                                                                                                          | <b>Mean marginal rate of substitution (standard deviation)</b> |                       | <b>P-value <sup>a</sup></b> |
|------------------------------------------------------------------------------------------------------------------------|----------------------------------------------------------------|-----------------------|-----------------------------|
|                                                                                                                        | <b>Choice frame 1</b>                                          | <b>Choice frame 2</b> |                             |
| Chronic migraine                                                                                                       |                                                                |                       |                             |
| Overall sample (N = 55)                                                                                                | 6.81 (5.62)                                                    | 7.63 (9.42)           | 0.343                       |
| Excluding participants completing the choice tasks in < 1 min (N = 50)                                                 | 6.63 (5.45)                                                    | 7.55 (9.33)           | 0.302                       |
| Episodic migraine                                                                                                      |                                                                |                       |                             |
| Overall sample (N = 46)                                                                                                | 9.76 (8.05)                                                    | 7.11 (6.38)           | 0.003                       |
| Excluding participants completing the choice tasks in < 1 min and those failing multiple other validity tests (N = 35) | 9.59 (7.93)                                                    | 7.20 (6.18)           | 0.007                       |

<sup>a</sup>Paired t-test
